# Supplementary material
Source: PubMed Central journal article supplement (PMC5525329)

**Analytical and Bioanalytical Chemistry**

**Electronic Supplementary Material**

**Microchip electrophoresis with laser-induced fluorescence detection  
for the determination of the ratio of nitric oxide to superoxide production  
in macrophages during inflammation**

Giuseppe Caruso, Claudia G. Fresta, Joseph M. Siegel, Manjula B. Wijesinghe,  
Susan M. Lunte

**Fig. S1** Calibration curves for DAF-FM T (NO-specific fluorescent product) and 2-OH-MitoE<sup>+</sup> (O<sub>2</sub><sup>-•</sup>-specific product). Standard deviations are represented by vertical bars

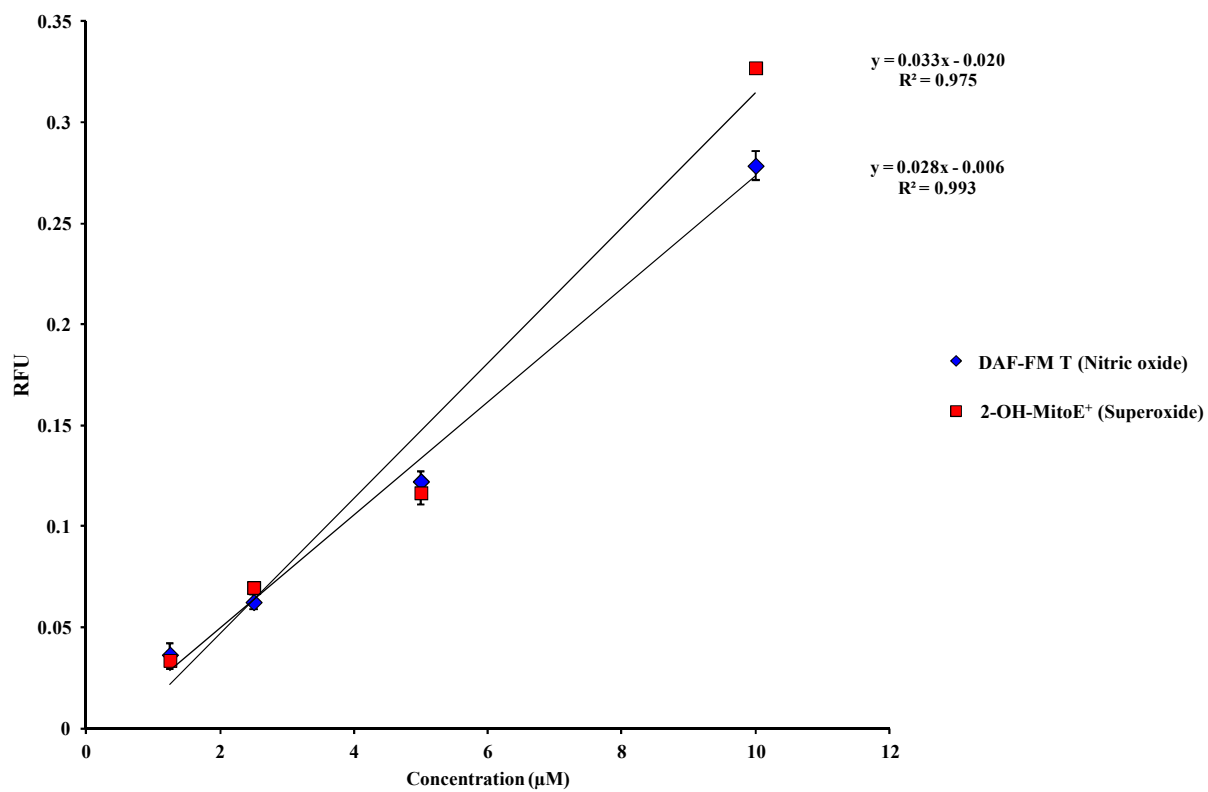

**Fig. S2** Variation of cell number as a function of the different stimulation protocols. Standard deviations are represented by vertical bars

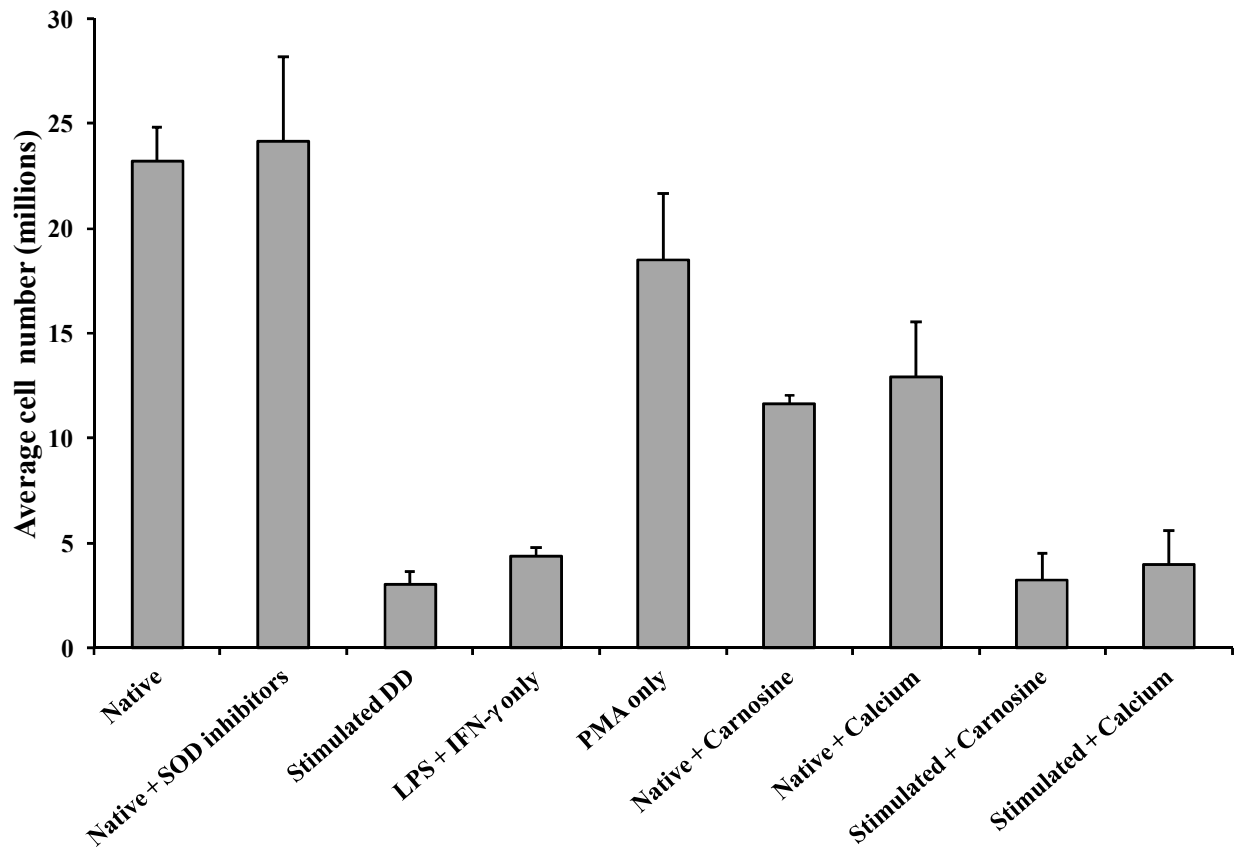

Supplement: NIHMS880352-supplement-216_2017_401_MOESM1_ESM.pdf [file NIHMS880352-supplement-216_2017_401_MOESM1_ESM.pdf]
